# Supplementary material for: miR-374a-5p: A New Target for Diagnosis and Drug Resistance Therapy in Gastric Cancer
Source: PubMed Central journal article supplement — Mol Ther Nucleic Acids. 2019 Aug 27;18:320–31. doi: 10.1016/j.omtn.2019.07.025 (PMC6796712; doi:10.1016/j.omtn.2019.07.025), 2019-08-27
Supplement: mmc1.pdf [file mmc1.pdf]

OMTN, Volume 18

## **Supplemental Information**

### **miR-374a-5p: A New Target for Diagnosis and Drug Resistance Therapy in Gastric Cancer**

**Runbi Ji, Xu Zhang, Hongbing Gu, Jichun Ma, Xiangmei Wen, Jingdong Zhou, Hui Qian, Wenrong Xu, Jun Qian, and Jiang Lin**

Supplementary Table 1. The sequences and modifications of the oligonucleotides.

| Oligonucleotides       | Sequences (5'-3')                                                                                                                                  | Modifications                                                                                                                             |
|------------------------|----------------------------------------------------------------------------------------------------------------------------------------------------|-------------------------------------------------------------------------------------------------------------------------------------------|
| miR-374a-5p mimics     | UUAUAAUACAACCUGAUAAGUG<br>CUUAUCAGGUUGUAUUAUAAUU                                                                                                   | “m” represents<br>2'-O-methyl-<br>modified<br>“s” represents<br>phosphorothioate<br>linkage<br>“Chol”<br>represents linked<br>cholesterol |
| mimics NC              | UUCUCCGAACGUGUCACGUTT<br>ACGUGACACGUUCGGAGAATT                                                                                                     |                                                                                                                                           |
| miR-374a-5p inhibitors | mCmAmCmUmUmAmUmCmAmGmGmUmUmGmUmAmUmUmAmUmAmA                                                                                                       |                                                                                                                                           |
| inhibitors NC          | mCmAmGmUmAmCmUmUmUmUmGmUmGmUmAmGmUmAmCmAmA                                                                                                         |                                                                                                                                           |
| Agomir-374a-5p         | mU(s)m(s)UmAmUmAmAmUmAmCmAmAmCmCmUmGmAmUmAmA(s)mG(s)mU(s)mG(s)-<br>Chol<br>mC(s)mU(s)mUmAmUmCmAmGmGmUmUmGmUmAmUmUmAmUmA(s)mA(s)mU(s)mU(s)-<br>Chol |                                                                                                                                           |
| Agomir NC              | mU(s)mU(s)mCmUmCmCmGmAmAmCmGmUmGmUmCmAmCmG(s)mU(s)mT(s)mT(s)-<br>Chol                                                                              |                                                                                                                                           |

|                       |                                                                         |  |
|-----------------------|-------------------------------------------------------------------------|--|
|                       | mA(s)mC(s)mGmUmGmAmCmAmCmGmUmUmCmGmGmAmGmA(s)mA(s)mT(s)mT(s)-<br>Chol   |  |
| Antagomir-<br>374a-5p | mC(s)mA(s)mCmUmUmAmUmCmAmGmGmUmUmGmUmAmUmUmA(s)mU(s)mA(s)mA(s)-<br>Chol |  |
| Antagomir NC          | mC(s)mA(s)mGmUmAmCmUmUmUmUmGmUmGmUmAmGmUmA(s)mC(s)mA(s)mA(s)-<br>Chol   |  |
| Si-Neurod1            | GCAACUCAAUCCUCGGACUTT<br>AGUCCGAGGAUUGAGUUGCTT                          |  |
| Scr of si-<br>Neurod1 | UUCUCCGAACGUGUCACGUTT<br>ACGUGACACGUUCGGAGAATT                          |  |

NC: negative control

Supplementary Table 2. Specific primers for target mRNAs.

| Primers or oligonucleotides | Sequence (5' to 3')   |
|-----------------------------|-----------------------|
| H-MDR1-F                    | TCCTGGAGCGGTTCTACGAC  |
| H-MDR1-R                    | GGCATGTATGTTGGCCTCCT  |
| H-TopoII-F                  | GGCTTCCTGAGGATTACTTG  |
| H- TopoII-R                 | GCCACTGATCCAGCTAATTG  |
| H-Neurod-F                  | GCCACGACACGAGGAATT    |
| H-Neurod-R                  | TCGCCCATCAGCCCACTCT   |
| H- $\beta$ -actin-F         | CACGAAACTACCTTCAACTCC |
| H- $\beta$ -actin-R         | CATACTCCTGCTTGCTGATC  |

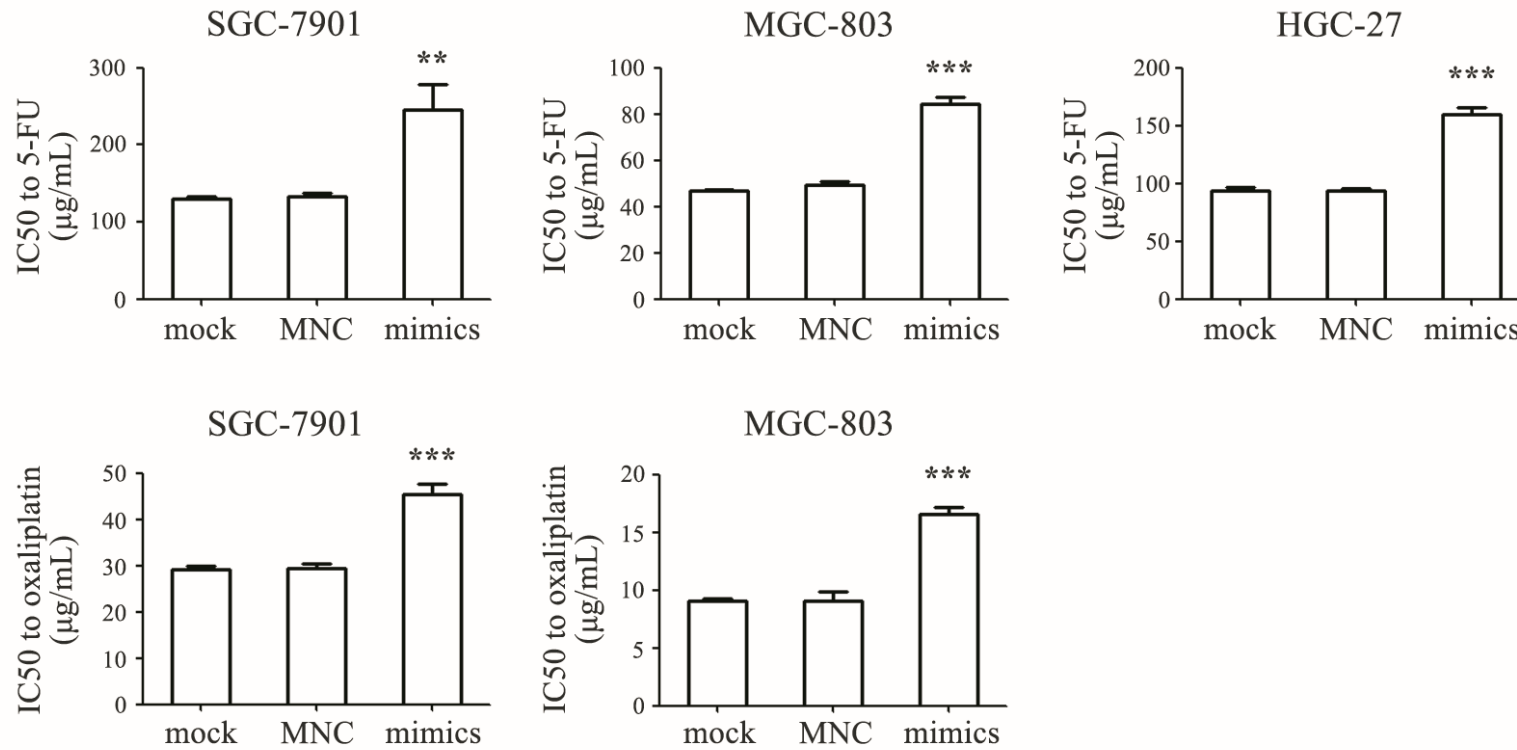

**Supplementary Figure 1. MiR-374a-5p increased the IC<sub>50</sub> of gastric cancer cells (HGC-27, MGC-803, and SGC-7901) to 5-FU and oxaliplatin.**

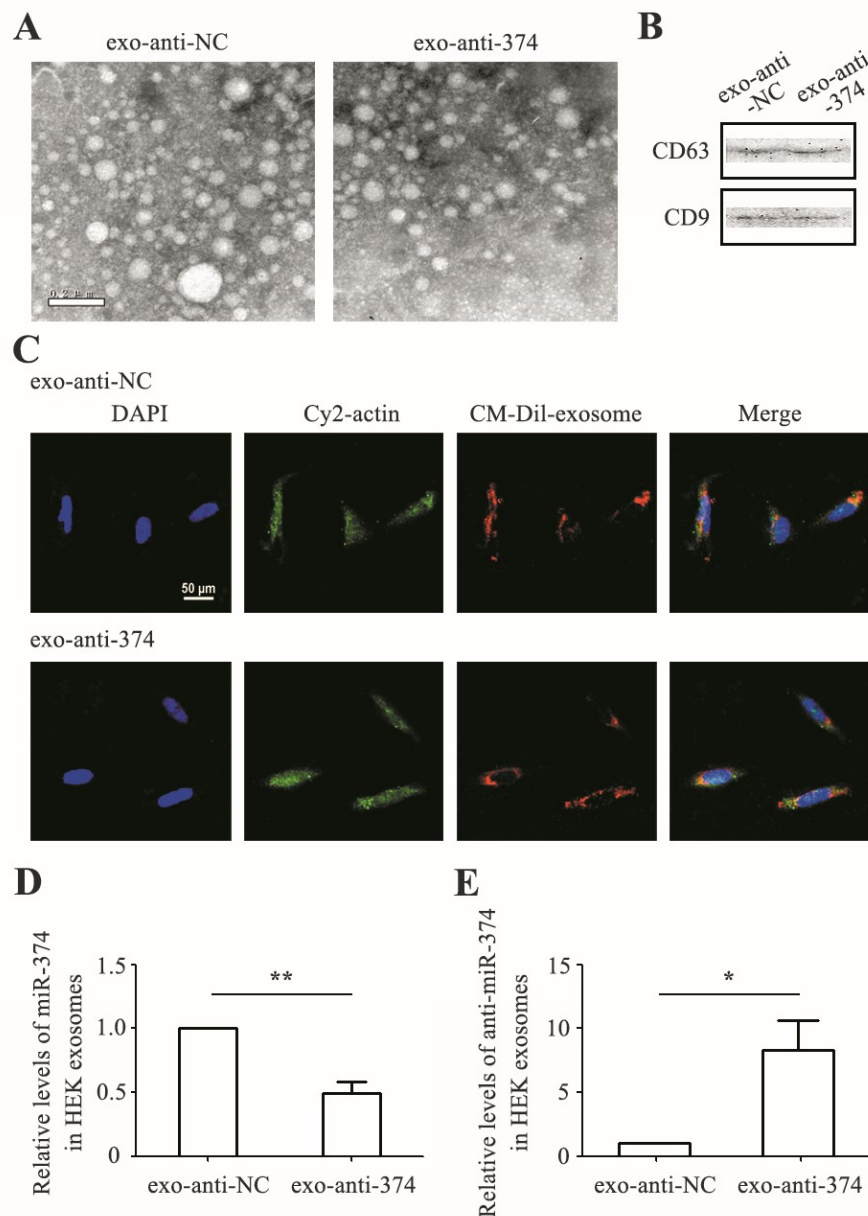

**Supplementary Figure 2. The identification of exosomes and the expression of miR-374a-5p and miR-374a-5p inhibitor in exosomes.** (A) The morphology of exosomes was observed by transmission electron microscope. Scale bar = 0.2  $\mu$ m. (B) Western blot detected the expression of CD63 and CD9. (C) Internalization of exosomes into HGC-27 cells. Exosomes labeled with CM-Dil (red) at 37°C for 1 h were added into HGC-27 cells for 4 h. Cells were fixed and stained for cytoplasm (Cy2-actin, green) and nuclei (DAPI, blue). Original magnification,  $\times 200$ . Scale bar = 50  $\mu$ m. (D, E) The expression of miR-374a-5p and miR-374a-5p inhibitor in exosomes was determined by qRT-PCR.
